# Supplementary material for: Hyperglycemia and Adverse Pregnancy Outcome Follow-up Study (HAPO FUS): Maternal Gestational Diabetes Mellitus and Childhood Glucose Metabolism
Source: Oxford University Press journal article supplement (doi:10.2337/dc18-1646), 2019-01-17
Supplement: dc181646supplementarydata.pdf [file dc181646supplementarydata.pdf]

SUPPLEMENTARY DATA

**Supplementary Table S1. Characteristics of HAPO FUS Participants and Non-Participants**

| <b>HAPO Maternal Characteristics</b> | <b>Participants<br/>N=4832</b> | <b>Non-Participants<br/>N=10980</b> | <b>Participants<br/>N=4832</b> | <b>Non-Participants<br/>N=10980</b> |
|--------------------------------------|--------------------------------|-------------------------------------|--------------------------------|-------------------------------------|
|                                      | <b>Unweighted Summaries</b>    |                                     | <b>Weighted Summaries*</b>     |                                     |
|                                      | <b>Mean (SD)</b>               | <b>Mean (SD)</b>                    | <b>Mean (SD)</b>               | <b>Mean (SD)</b>                    |
| Age at OGTT(yrs)                     | 29.9 (5.7)                     | 29.1 (5.7)                          | 30.0 (5.1)                     | 29.1 (5.3)                          |
| Body Mass Index (BMI)                | 27.5 (4.9)                     | 27.5 (5.1)                          | 27.5 (4.6)                     | 27.5 (4.7)                          |
| Height (cm)                          | 161.8 (6.8)                    | 160.7 (7.3)                         | 161.1 (6.2)                    | 160.9 (6.3)                         |
| Fasting Plasma Glucose (mmol/l)      | 4.5 (0.4)                      | 4.5 (0.4)                           | 4.5 (0.4)                      | 4.5 (0.4)                           |
| 1-hr Plasma Glucose (mmol/l)         | 7.4 (1.7)                      | 7.5 (1.7)                           | 7.5 (1.7)                      | 7.5 (1.7)                           |
| 2-hr Plasma Glucose (mmol/l)         | 6.1 (1.3)                      | 6.2 (1.3)                           | 6.2 (1.3)                      | 6.2 (1.3)                           |
|                                      | <b>N (%)</b>                   | <b>N (%)</b>                        | <b>(%)</b>                     | <b>(%)</b>                          |
| GDM                                  | 683 (14.1)                     | 1879 (17.1)                         | (14.9)                         | (16.9)                              |
| Race/Ethnicity                       |                                |                                     |                                |                                     |
| White, non-Hispanic                  | 2287 (47.3)                    | 4705 (42.9)                         | (44.5)                         | (44.1)                              |
| Hispanic                             | 507 (10.5)                     | 1047 (9.5)                          | (10.3)                         | (9.6)                               |
| Black, non-Hispanic                  | 775 (16.0)                     | 1551 (14.1)                         | (14.8)                         | (14.6)                              |
| Asian                                | 1176 (24.3)                    | 3424 (31.2)                         | (28.5)                         | (29.3)                              |
| Other                                | 87 (1.8)                       | 253 (2.3)                           | (1.8)                          | (2.3)                               |

\* Weighted summaries are weighted means and standard deviations or weighted percentages based on field-center-specific summary statistics with weights proportional to the total eligible population at the field center.

\*\*GDM=gestational diabetes mellitus defined by IADPSG criteria (1 or more glucose values from a 75g OGTT equals or exceeds FPG 5.1 mmol/l, 1-hr 10.0 mmol/l, 2-hr 8.5 mmol/l)

SUPPLEMENTARY DATA

**Supplementary Table S2. Association of Maternal GDM Status during Pregnancy with Continuous Child Metabolic Outcomes**

| Continuous Child Glucose Outcome | Model 5<br>Beta (95% CI)<br>p-value, R <sup>2</sup> | Model 6<br>Beta (95% CI)<br>p-value, R <sup>2</sup> | Model 7<br>Beta (95% CI)<br>p-value, R <sup>2</sup> | Model 8<br>Beta (95% CI)<br>p-value, R <sup>2</sup> |
|----------------------------------|-----------------------------------------------------|-----------------------------------------------------|-----------------------------------------------------|-----------------------------------------------------|
| Fasting glucose (mmol/l)         | 0.021 (-0.0096-0.052)<br>p=0.18, 0.23               | 0.021 (-0.0095-0.053)<br>p=0.17, 0.23               | 0.021 (-0.0096-0.052)<br>p=0.18, 0.23               | 0.021 (-0.0096-0.052)<br>p=0.18, 0.23               |
| 30 min glucose (mmol/l)          | 0.26 (0.15-0.38)<br>p<0.0001, 0.12                  | 0.28 (0.17-0.40)<br>p<0.0001, 0.12                  | 0.27 (0.15-0.38)<br>p<0.0001, 0.12                  | 0.28 (0.17-0.40)<br>p<0.0001, 0.12                  |
| 1-h glucose (mmol/l)             | 0.31 (0.16-0.46)<br>p<0.0001, 0.079                 | 0.33 (0.18-0.48)<br>p<0.0001, 0.081                 | 0.31 (0.16-0.45)<br>p<0.0001, 0.079                 | 0.33 (0.18-0.48)<br>p<0.0001, 0.081                 |
| 2-h glucose (mmol/l)             | 0.17 (0.067-0.26)<br>p=0.0010, 0.11                 | 0.18 (0.083-0.28)<br>p=0.0003, 0.11                 | 0.16 (0.064-0.26)<br>p=0.0012, 0.11                 | 0.18 (0.080-0.28)<br>p=0.0004, 0.11                 |
| Sum of glucose z-scores          | 0.58 (0.35-0.82)<br>p<0.001, 0.18                   | 0.62 (0.39-0.86)<br>p<0.001, 0.18                   | 0.58 (0.35-0.82)<br>p<0.001, 0.18                   | 0.62 (0.39-0.86)<br>p<0.001, 0.18                   |
| Matsuda index                    | -59.8 (-113.0- -6.6)<br>p=0.028, 0.40               | -60.9 (-114.5- -7.4)<br>p=0.026, 0.40               | -58.5 (-112.6- -4.4)<br>p=0.034, 0.38               | -58.4 (-112.8- -4.0)<br>p=0.035, 0.38               |
| Insulinogenic index              | -0.055 (-0.12-0.0083)<br>p=0.091, 0.076             | -0.064 (-0.13- -0.0012)<br>p=0.046, 0.078           | -0.055 (-0.12-0.0077)<br>p=0.087, 0.074             | -0.065 (-0.13-0.0018)<br>p=0.043, 0.077             |
| Disposition index                | -0.11 (-0.16- -0.05)<br>p=0.0001, 0.78              | -0.11 (-0.17- -0.06)<br>p<0.0001, 0.79              | -0.11 (-0.16- -0.05)<br>p=0.0001, 0.77              | -0.11 (-0.17- -0.06)<br>p<0.0001, 0.78              |

\*GDM=gestational diabetes mellitus defined by IADPSG criteria (1 or more glucose values from a 75g OGTT equals or exceeds FPG 5.1 mmol/l, 1-hr 10.0 mmol/l, 2-hr 8.5 mmol/l). Disposition index was log transformed for analysis.

Model 1: Adjusted for field center + child age, sex, pubertal status (Tanner stage 1, 2/3, 4/5, sex x Tanner stage interaction) + maternal variables at pregnancy OGTT (age, height, mean arterial pressure, parity (0, 1+), smoking (yes/no), drinking (yes/no), gestational age), child's family history of diabetes in first degree relatives. Model 5: Model 1 + child's percent body fat. Model 6: Model 1 + maternal BMI at pregnancy OGTT + child's percent body fat. Model 7: Model 1 + child's sum of skinfolds. Model 8: Model 1 + maternal BMI at pregnancy OGTT + child's sum of skinfolds.

SUPPLEMENTARY DATA

**Supplementary Table S3. Association of Maternal GDM Status during Pregnancy with Dichotomous Child Metabolic Outcomes**

| Dichotomous Child Glucose Outcome | Model 5                                   |                                     | Model 6                                   |                                     | Model 7                                   |                                     | Model 8                                   |                                     |
|-----------------------------------|-------------------------------------------|-------------------------------------|-------------------------------------------|-------------------------------------|-------------------------------------------|-------------------------------------|-------------------------------------------|-------------------------------------|
|                                   | OR (95% CI)<br>p-value,<br>C-statistic    | Risk Difference (95% CI)<br>p-value | OR (95% CI)<br>p-value,<br>C-statistic    | Risk Difference (95% CI)<br>p-value | OR (95% CI)<br>p-value,<br>C-statistic    | Risk Difference (95% CI)<br>p-value | OR (95% CI)<br>p-value,<br>C-statistic    | Risk Difference (95% CI)<br>p-value |
| IFG-ADA                           | 1.09<br>(0.78-1.52)<br>p=0.60<br>C=0.78   | 0.0057<br>(-0.019-0.031)<br>p=0.66  | 1.09<br>(0.78-1.53)<br>p=0.61<br>C=.78    | 0.0057<br>(-0.019-0.031)<br>p=0.65  | 1.09<br>(0.78-1.52)<br>p=0.60<br>C=.78    | 0.0057<br>(-0.019-0.031)<br>p=0.65  | 1.09<br>(0.78-1.53)<br>p=0.61<br>C=.78    | 0.0057<br>(-0.019-0.031)<br>p=0.65  |
| IGT                               | 1.82<br>(1.31-2.52)<br>p=0.0003<br>C=0.72 | 0.043<br>(0.017-0.068)<br>p=0.0010  | 1.92<br>(1.38-2.67)<br>p=0.0001<br>C=0.72 | 0.045<br>(0.020-0.071)<br>p=0.0005  | 1.82<br>(1.31-2.52)<br>p=0.0003<br>C=0.72 | 0.042<br>(0.017-0.067)<br>p=0.0012  | 1.92<br>(1.38-2.68)<br>p=0.0001<br>C=0.72 | 0.045<br>(0.019-0.070)<br>p=0.0006  |

GDM=gestational diabetes mellitus defined by IADPSG criteria (1 or more glucose values from a 75g OGTT equals or exceeds FPG 5.1 mmol/l, 1-hr 10.0 mmol/l, 2-hr 8.5 mmol/l)

IFG-ADA=impaired fasting glucose defined by ADA criteria (FPG 5.6-6.9 mmol/l)

IGT=impaired glucose tolerance (2-h PG 7.8-11.0 mmol/l)

Model 1: Adjusted for field center + child age, sex, pubertal status (Tanner stage 1, 2/3, 4/5, sex x Tanner stage interaction) + maternal variables at pregnancy OGTT (age, height, mean arterial pressure, parity (0, 1+), smoking (yes/no), drinking (yes/no), gestational age), child's family history of diabetes in first degree relatives. Model 5: Model 1 + child's percent body fat. Model 6: Model 1 + maternal BMI at pregnancy OGTT + child's percent body fat. Model 7: Model 1 + child's sum of skinfolds. Model 8: Model 1 + maternal BMI at pregnancy OGTT + child's sum of skinfolds.

SUPPLEMENTARY DATA

**Supplementary Table S4. Tanner Stage Specific Associations between Maternal GDM during pregnancy and Child Metabolic Outcomes**

|                                   | Tanner Stage 1                               | Tanner Stage 2/3               | Tanner Stage 4/5               |
|-----------------------------------|----------------------------------------------|--------------------------------|--------------------------------|
| <b>Child Dichotomous Outcomes</b> | <b>OR* (95% CI), p</b>                       |                                |                                |
| IFG-ADA                           | 1.22 (0.57-2.62), p=0.61                     | 1.54 (0.90-2.62), p=0.11       | 0.41 (0.16-1.02), p=0.06       |
| IGT                               | 2.17 (0.85-5.58), p=0.11                     | 1.60 (0.93-2.77), p=0.09       | 3.02 (1.45-6.31), p=0.003      |
| <b>Child Continuous Outcomes</b>  | <b>Adjusted Mean Difference* (95% CI), p</b> |                                |                                |
| Fasting glucose (mmol/l)          | 0.015 (-0.061-0.091), p=0.70                 | 0.020 (-0.031-0.072), p=0.44   | -0.0080 (-0.073-0.057), p=0.81 |
| 30 min glucose (mmol/l)           | 0.11 (-0.17-0.39), p=0.44                    | 0.34 (0.15-0.52), p=0.0005     | 0.41 (0.18-0.63), p=0.0005     |
| 1-h glucose (mmol/l)              | 0.16 (-0.20-0.53), p=0.37                    | 0.46 (0.21-0.72), p=0.0004     | 0.49 (0.19-0.78), p=0.0013     |
| 2-h glucose (mmol/l)              | 0.10 (-0.12-0.33), p=-.38                    | 0.13 (-0.032-0.30), p=0.12     | 0.28 (0.081-0.49), p=0.0062    |
| Sum of glucose z-scores           | 0.16 (-0.42-0.74), p=0.59                    | 0.75 (0.35-1.15), p=0.0002     | 0.89 (0.38-1.39), p=0.0006     |
| Matsuda index                     | -67.3 (-204.1-69.5), p=0.34                  | -102.0 (-196.3- -7.7), p=0.034 | -50.4 (-145.7-45.0), p=0.30    |
| Insulinogenic index               | -0.04 (-0.18-0.10), p=0.60                   | -0.03 (-0.12-0.06), p=0.47     | -0.23 (-0.40- -0.06), p=0.010  |
| Disposition index                 | -0.07 (-.19-0.05), p=0.28                    | -0.13 (-0.23- -0.05), p=0.003  | -0.20 (-0.31- -0.09), p=0.0005 |

GDM=gestational diabetes mellitus defined by IADPSG criteria (1 or more glucose values from a 75g OGTT equals or exceeds FPG 5.1 mmol/l, 1-hr 10.0 mmol/l, 2-hr 8.5 mmol/l)

\*Association results use fully adjusted Model 4: Adjusted for field center + child age, sex, pubertal status (Tanner stage 1, 2/3, 4/5, sex x Tanner stage interaction) + maternal variables at pregnancy OGTT (age, height, mean arterial pressure, parity (0, 1+), smoking (yes/no), drinking (yes/no), gestational age), child's family history of diabetes in first degree relatives + maternal BMI at pregnancy OGTT + child's BMI z-score.

SUPPLEMENTARY DATA

**Supplementary Table S5. Child Metabolic Outcomes for Maternal GDM during Pregnancy by Carpenter-Coustan Criteria, GDM by IADPSG/WHO Criteria only, and No GDM**

|                                   | Carpenter-Coustan GDM | IADPSG/WHO Only GDM | No GDM         | IADPSG/WHO Only GDM v. No GDM*           |                |
|-----------------------------------|-----------------------|---------------------|----------------|------------------------------------------|----------------|
| <b>Child Dichotomous Outcomes</b> | <b>N/N Total (%)</b>  |                     |                | <b>OR (95% CI)</b>                       | <b>p-value</b> |
| IFG-ADA                           | 15/143 (10.5)         | 39/444 (8.8)        | 262/3563 (7.4) | 0.99 (0.65-1.52)                         | 0.97           |
| IGT                               | 25/140 (17.9)         | 36/436 (8.3)        | 177/3518 (5.0) | 1.64 (1.04-2.58)                         | 0.033          |
| <b>Child Continuous Outcomes</b>  | <b>Mean (SD)</b>      |                     |                | <b>Adjusted Mean Difference (95% CI)</b> | <b>p-value</b> |
| Fasting glucose (mmol/l)          | 5.1 (0.4)             | 5.0 (0.4)           | 5.0 (0.4)      | -0.0028 (-0.042-0.036)                   | 0.89           |
| 30 min glucose (mmol/l)           | 8.3 (1.5)             | 8.1 (1.3)           | 7.7 (1.3)      | 0.28 (0.14-0.43)                         | 0.0001         |
| 1-h glucose (mmol/l)              | 7.5 (2.0)             | 7.2 (1.7)           | 6.8 (1.7)      | 0.34 (0.15-0.53)                         | 0.0004         |
| 2-h glucose (mmol/l)              | 6.4 (1.3)             | 6.2 (1.2)           | 5.9 (1.1)      | 0.13 (0.0068-0.25)                       | 0.039          |
| Sum of glucose z-scores           | 1.3 (3.3)             | 0.7 (2.8)           | -0.2 (2.8)     | 0.54 (0.23-0.84)                         | 0.0005         |
| Matsuda index                     | 1542.3 (703.7)        | 1645.8 (673.3)      | 1838.4 (753.3) | -52.3 (-121.3-16.7)                      | 0.14           |
| Insulinogenic index               | 0.81 (0.57)           | 0.78 (0.66)         | 0.82 (0.70)    | -0.10 (-0.18- -0.020)                    | 0.015          |
| Disposition index                 | 6.85 (0.62)           | 6.89 (0.58)         | 7.05 (0.57)    | -0.13 (-0.20- -0.063)                    | 0.0002         |

Carpenter-Coustan GDM=gestational diabetes mellitus defined by Carpenter-Coustan criteria (2 or more glucose values from a 75g OGTT equals or exceeds FPG 5.3 mmol/l, 1-hr 10.0 mmol/l, 2-hr 8.6 mmol/l)

IADPSG/WHO Only GDM=gestational diabetes mellitus defined by IADPSG/WHO criteria (1 or more glucose values from a 75g OGTT equals or exceeds FPG 5.1 mmol/l, 1-hr 10.0 mmol/l, 2-hr 8.5 mmol/l) but not meeting Carpenter-Coustan Criteria

\*Association results remove Carpenter-Coustan GDM mothers from analysis and use fully adjusted Model 4: Adjusted for field center + child age, sex, pubertal status (Tanner stage 1, 2/3, 4/5, sex x Tanner stage interaction) + maternal variables at pregnancy OGTT (age, height, mean arterial pressure, parity (0, 1+), smoking (yes/no), drinking (yes/no), gestational age), child's family history of diabetes in first degree relatives + maternal BMI at pregnancy OGTT + child's BMI z-score.

SUPPLEMENTARY DATA

**Supplementary Figure 1.** Flow chart describing enrollment for HAPO FUS.

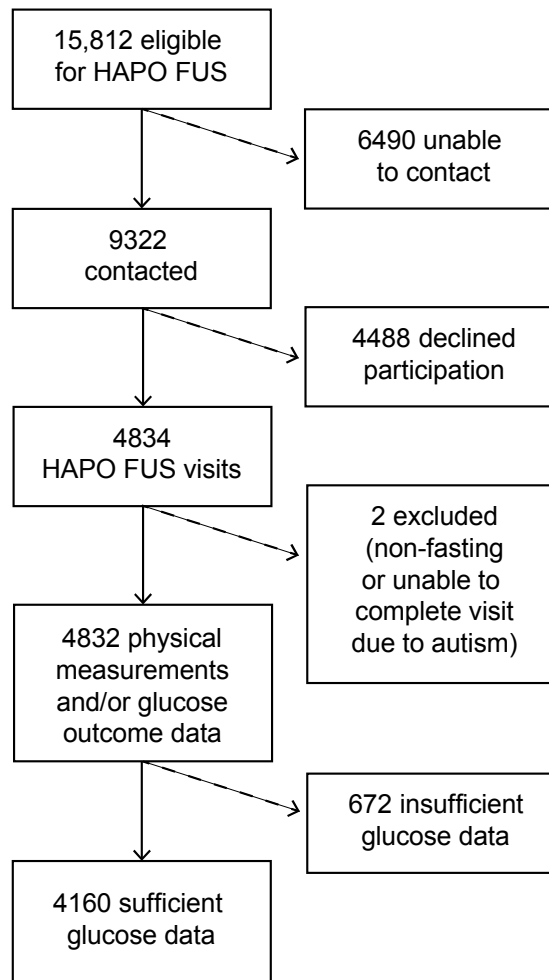

## SUPPLEMENTARY DATA

### APPENDIX

#### HAPO Follow-Up Study Cooperative Research Group

##### Field Centers:

**Bangkok** Chaicharn Deerochanawong, Thadchanan Tanaphonpoonsuk (Rajavithi Hospital), Sukeeta Binratkaew Uraivan Chotigeat, Wanee Manyam, (Queen Sirikit National Institute of Child Health)

**Barbados** Martinette Forde, Andre Greenidge, Kathleen Neblett, Paula Michele Lashley, Desiree Walcott (Queen Elizabeth Hospital/School of Clinical Medicine and Research, University of the West Indies, Barbados)

**Belfast** Katie Corry, Loraine Francis, Jo-anne Irwin, Anne Langan, David R McCance, Maureen Mousavi, (Belfast Health and Social Care Trust), Ian Young (Queen's University Belfast)

**Bellflower** Jennifer Gutierrez, Jennifer Jimenez, Jean M Lawrence, David A Sacks, Harpreet S Takhar, Elizabeth Tanton (Kaiser Permanente Southern California)

**Chicago** Wendy J Brickman, Jennifer Howard, Jami L Josefson, Lauren Miller (Ann and Robert H Lurie Children's Hospital/Northwestern University Feinberg School of Medicine)

**Cleveland** Jacqui Bjaloncik, Patrick M Catalano, Ajuah Davis, Michaela Koontz, Lorraine Presley, Shoi Smith, Amanda Tyhulski (MetroHealth Medical Center/Case Western Reserve University)

**Hong Kong** Albert Martin Li, Ronald C Ma, Risa Ozaki, Wing Hung Tam, Michelle Wong, Cindy Siu Man Yuen (The Chinese University of Hong Kong/Prince of Wales Hospital)

**Manchester** Peter E Clayton, Aysha Khan, Avni Vyas (Royal Manchester Children's Hospital, Central Manchester University Hospitals NHS Foundation Trust, Manchester Academic Health Sciences Centre/School of Medical Sciences, Faculty of Biology, Medicine & Health, University of Manchester), Michael Maresh (St. Mary's Hospital, Central Manchester University Hospitals NHS Foundation Trust, Manchester Academic Health Sciences Centre)

**Petah-Tiqva** Hadasse Benzaquen, Naama Glickman, Alona Hamou, Orna Hermon, Orit Horesh, Yael Keren, Yael Lebenthal, Shlomit Shalitin (Schneider Children's Medical Center of Israel)

**Toronto** Kristina Cordeiro, Jill Hamilton, Hahn Y Nguyen, Shawna Steele (The Hospital for Sick Children, University of Toronto)

**Coordinating Centers:** Fei Chen, Alan R Dyer, Wenyu Huang, Alan Kuang, Maria Jimenez, Lynn P Lowe, William L Lowe, Jr, Boyd E Metzger, Michael Nodzenski, Anna Reisetter, Denise Scholtens, Octavious Talbot, Paul Yim (Northwestern University Feinberg School of Medicine)

**Consultants:** David Dunger, Alicia Thomas

**NIDDK:** Mary Horlick, Barbara Linder, Aynur Unalp-Arida

**NICHD:** Gilman Grave
